# Supplementary material for: The Soft Coral Sarcophyton trocheliophorum: A Warehouse of Terpenoids with Structural and Pharmacological Diversity
Source: MDPI journal article supplement (doi:10.3390/md21010030), 2022-12-29
Supplement: s1 [file s1]

# Supplementary Materials

**Table S1.** Terpenoidal metabolites isolated from the soft coral *Sarcophyton trocheliophorum*.

| No. | Name                                                                                                                 | Locality                         | Bioassay                                             | Class                            | Ref.      |
|-----|----------------------------------------------------------------------------------------------------------------------|----------------------------------|------------------------------------------------------|----------------------------------|-----------|
| 1   | trocheliophorin                                                                                                      | Kurside Island, India            | -                                                    | trocheliophorane sesquiterpenoid | [15]      |
| 2   | palustrol                                                                                                            | Jeddah, Saudi Arabia             | antibacterial, antifungal,<br>antitumor, antifeedant | aromadendrane sesquiterpenoid    | [16]      |
| 3   | alloaromadendrene                                                                                                    | Hurgada, Egypt                   | -                                                    | aromadendrane sesquiterpenoid    | [17]      |
| 4   | $\beta$ -elemene                                                                                                     | Hurgada, Egypt                   | -                                                    | elemene sesquiterpenoid          | [17]      |
| 5   | <i>trans</i> -caryophyllene                                                                                          | Hurgada, Egypt                   | -                                                    | caryophyllane sesquiterpenoid    | [17]      |
| 6   | bisabolene                                                                                                           | Hurgada, Egypt                   | -                                                    | bisabolane sesquiterpenoid       | [17]      |
| 7   | trocheliophorol                                                                                                      | Seychelles Islands, Indian Ocean | -                                                    | cembrane diterpenoid             | [3] [18]  |
|     |                                                                                                                      | Orpheus Island, Australia        | antifeedant                                          | cembrane diterpenoid             | [20]      |
| 8   | thunbergol                                                                                                           | Orpheus Island, Australia        | antifeedant                                          | cembrane diterpenoid             | [20]      |
|     |                                                                                                                      | Orpheus Island, Australia        | antifeedant                                          | cembrane diterpenoid             | [20]      |
| 9   | 7,8-epoxy-1 <i>E</i> ,3 <i>E</i> ,11 <i>E</i> -cembratriene-15-ol                                                    | Pulau Hantu, Singapore           | cytotoxic                                            | cembrane diterpenoid             | [8]       |
| 10  | 13 <i>S</i> -hydroxy-(-)-neocembrene                                                                                 | Seychelles Islands, Indian Ocean | cytotoxic                                            | cembrane diterpenoid             | [21]      |
| 11  | 13 <i>S</i> -hydroxy-11,12-epoxy-(-)-neocembrene                                                                     | Seychelles Islands, Indian Ocean | cytotoxic                                            | cembrane diterpenoid             | [21] [22] |
| 12  | neocembrene                                                                                                          | Seychelles Islands, Indian Ocean | cytotoxic                                            | cembrane diterpenoid             | [21] [22] |
| 13  | (7 <i>R</i> ,8 <i>R</i> ,14 <i>S</i> ,1 <i>E</i> ,3 <i>E</i> ,11 <i>E</i> )-7,8-epoxycembra-1,3,11-trien-14-ol       | Orpheus Island, Australia        | cytotoxic                                            | cembrane diterpenoid             | [23]      |
| 14  | (7 <i>R</i> ,8 <i>R</i> ,14 <i>S</i> ,1 <i>E</i> ,3 <i>E</i> ,11 <i>E</i> )-14-acetoxy-7,8-epoxycembra-1,3,11-triene | Orpheus Island, Australia        | cytotoxic                                            | cembrane diterpenoid             | [23]      |
| 15  | (7 <i>R</i> ,14 <i>S</i> ,1 <i>E</i> ,3 <i>E</i> ,8 <i>E</i> ,11 <i>E</i> )-cembra-1,3,8,11-tetraene-7,14-diol       | Orpheus Island, Australia        | cytotoxic                                            | cembrane diterpenoid             | [23]      |
|     |                                                                                                                      | Pulau Hantu, Singapore           | cytotoxic                                            | cembrane diterpenoid             | [8]       |
| 16  | isoneocembrene/cembrene-C                                                                                            | Hainan Island, South China Sea   | PTP1B inhibitory                                     | cembrane diterpenoid             | [25]      |
|     |                                                                                                                      | Jeddah, Saudi Arabia             | antibacterial, antifungal,<br>antifeedant, cytotoxic | cembrane diterpenoid             | [16]      |
| 17  | 7,8-epoxy-1 <i>E</i> ,3 <i>E</i> ,11 <i>E</i> -cembratriene                                                          | Pulau Hantu, Singapore           | cytotoxic                                            | cembrane diterpenoid             | [8]       |

| No. | Name                                                                       | Locality                                                        | Bioassay                      | Class                | Ref.         |
|-----|----------------------------------------------------------------------------|-----------------------------------------------------------------|-------------------------------|----------------------|--------------|
| 18  | yalongene A                                                                | Hainan Island, South China Sea                                  | neuroprotective               | cembrane diterpenoid | [24]         |
| 19  | yalongene B                                                                | Hainan Island, South China Sea                                  | neuroprotective               | cembrane diterpenoid | [24]         |
| 20  | sarcophytonolide M                                                         | Hainan Island, South China Sea                                  | PTP1B inhibitory              | cembrane diterpenoid | [4]          |
| 21  | sarcophytonolide N                                                         | Hainan Island, South China Sea                                  | PTP1B inhibitory, cytotoxic   | cembrane diterpenoid | [25]         |
| 22  | sarcophytonolide O                                                         | Hainan Island, South China Sea                                  | PTP1B inhibitory, cytotoxic   | cembrane diterpenoid | [25]         |
| 23  | sarcophytonolide P                                                         | Hainan Island, South China Sea                                  | PTP1B inhibitory, cytotoxic   | cembrane diterpenoid | [25]         |
| 24  | sarcophytonolide Q                                                         | Hainan Island, South China Sea                                  | PTP1B inhibitory, cytotoxic   | cembrane diterpenoid | [25]         |
| 25  | sarcophytonolide S                                                         | Hainan Island, South China Sea                                  | PTP1B inhibitory              | cembrane diterpenoid | [26]         |
| 26  | sarcophytonolide T                                                         | Hainan Island, South China Sea                                  | PTP1B inhibitory              | cembrane diterpenoid | [26]         |
| 27  | sarcophytonolide U                                                         | Hainan Island, South China Sea                                  | PTP1B inhibitory              | cembrane diterpenoid | [26]         |
| 28  | (E,E,E)-1-isopropenyl-4,8,12-trimethylcyclotetradeca-3,7,11-triene         | Hainan Island, South China Sea                                  | PTP1B inhibitory, cytotoxic   | cembrane diterpenoid | [25]         |
| 29  | sarcophytonolide A                                                         | Hainan Island, South China Sea                                  | -                             | cembrane diterpenoid | [26]         |
| 30  | (E,E,E)-7,8-epoxy-1-isopropyl-4,8,12-trimethylcyclotetradeca-1,3,11-triene | Hainan Island, South China Sea                                  | -                             | cembrane diterpenoid | [26]         |
| 31  | sarcophytrol D                                                             | Hainan Island, South China Sea                                  | PTP1B inhibitory              | cembrane diterpenoid | [27]         |
| 32  | sarcophytrol E                                                             | Hainan Island, South China Sea                                  | PTP1B inhibitory              | cembrane diterpenoid | [27]         |
| 33  | sarcophytrol F                                                             | Hainan Island, South China Sea                                  | PTP1B inhibitory              | cembrane diterpenoid | [27]         |
| 34  | sarcophytrol G                                                             | Hainan Island, South China Sea                                  | PTP1B inhibitory              | cembrane diterpenoid | [28]         |
| 35  | sarcophytrol H                                                             | Hainan Island, South China Sea                                  | PTP1B inhibitory              | cembrane diterpenoid | [28]         |
| 36  | sarcophytrol I                                                             | Hainan Island, South China Sea                                  | PTP1B inhibitory              | cembrane diterpenoid | [28]         |
| 37  | sarcophytrol J                                                             | Hainan Island, South China Sea<br>Ximao Island, South China Sea | PTP1B inhibitory<br>cytotoxic | cembrane diterpenoid | [28]<br>[31] |
| 38  | sarcophytrol K                                                             | Hainan Island, South China Sea                                  | PTP1B inhibitory              | cembrane diterpenoid | [28]         |
| 39  | sarcophytrol L                                                             | Hainan Island, South China Sea                                  | PTP1B inhibitory              | cembrane diterpenoid | [28]         |
| 40  | 11,12-epoxy-1(E),3(E),7(E)-cembratrien-15-ol                               | Hainan Island, South China Sea                                  | PTP1B inhibitory              | cembrane diterpenoid | [27]         |
| 41  | sinugibberol                                                               | Hainan Island, South China Sea                                  | PTP1B inhibitory              | cembrane diterpenoid | [27]         |
| 42  | crassumol A                                                                | Hainan Island, South China Sea<br>Ximao Island, South China Sea | PTP1B inhibitory<br>cytotoxic | cembrane diterpenoid | [28]<br>[31] |
| 43  | sarglaucol                                                                 | Hainan Island, South China Sea                                  | PTP1B inhibitory              | cembrane diterpenoid | [29]         |

| No. | Name                                                                  | Locality                       | Bioassay                                   | Class                | Ref. |
|-----|-----------------------------------------------------------------------|--------------------------------|--------------------------------------------|----------------------|------|
| 44  | 7 <i>R</i> *,8 <i>R</i> *-epoxy-isoneocembyance A-16-oic methyl ester | Hainan Island, South China Sea | cytotoxic, acetylcholinesterase inhibitory | cembrane diterpenoid | [30] |
| 45  | 4- <i>epithunbergol</i>                                               | Hainan Island, South China Sea | cytotoxic, acetylcholinesterase inhibitory | cembrane diterpenoid | [30] |
| 46  | <i>cis</i> -cembrene C                                                | Hurgada, Egypt                 | antifeedant, antibacterial, antifungal     | cembrane diterpenoid | [17] |
| 47  | <i>cis</i> -cembrenene C                                              | Hurgada, Egypt                 | antifeedant, antibacterial, antifungal     | cembrane diterpenoid | [17] |
| 48  | (+)-sarcophytol A                                                     | Hurgada, Egypt                 | antifeedant, antibacterial, antifungal     | cembrane diterpenoid | [31] |
| 49  | ximaosarcophytol A                                                    | Ximao Island, South China Sea  | cytotoxic                                  | cembrane diterpenoid | [32] |
| 50  | ximaosarcophytol B                                                    | Ximao Island, South China Sea  | cytotoxic                                  | cembrane diterpenoid | [32] |
| 51  | 15-hydroxycembra-1,3,7,11-tetraene                                    | Ximao Island, South China Sea  | cytotoxic                                  | cembrane diterpenoid | [32] |
| 52  | 1,13-di- <i>epi</i> -13-acetoxy launine P                             | Xisha Islands, South China Sea | antibacterial, antiviral                   | cembrane diterpenoid | [33] |
| 53  | 13-oxo-thunbergol                                                     | Xisha Islands, South China Sea | antibacterial, antiviral                   | cembrane diterpenoid | [33] |
| 54  | launine P                                                             | Xisha Islands, South China Sea | antibacterial, antiviral                   | cembrane diterpenoid | [33] |
| 55  | (+)-sarcophytoxide                                                    | Leti, Indonesia                | -                                          | cembrane diterpenoid | [3]  |
|     |                                                                       | Orpheus Island, Australia      | -                                          |                      | [23] |
| 56  | isosarcophytoxide                                                     | Leti, Indonesia                | -                                          | cembrane diterpenoid | [3]  |
|     |                                                                       | Kenting, Taiwan Island         | cytotoxic                                  |                      | [34] |
| 57  | 16-deoxysarcophine                                                    | Kenting, Taiwan Island         | cytotoxic                                  | cembrane diterpenoid | [35] |
| 58  | (-)-sarcophytoxide                                                    | Hainan Island, South China Sea | cytotoxic                                  | cembrane diterpenoid | [30] |
| 59  | sarcophytol M                                                         | Hainan Island, South China Sea | cytotoxic, PTP1B inhibitory, antibacterial | cembrane diterpenoid | [29] |
| 60  | sarcophytol N                                                         | Hainan Island, South China Sea | cytotoxic, PTP1B inhibitory, antibacterial | cembrane diterpenoid | [29] |
| 61  | sarcophytol O                                                         | Hainan Island, South China Sea | cytotoxic, PTP1B inhibitory, antibacterial | cembrane diterpenoid | [29] |
| 62  | sarcophytol P                                                         | Hainan Island, South China Sea | cytotoxic, PTP1B inhibitory, antibacterial | cembrane diterpenoid | [29] |

| No. | Name                                              | Locality                       | Bioassay                                             | Class                | Ref.      |
|-----|---------------------------------------------------|--------------------------------|------------------------------------------------------|----------------------|-----------|
| 63  | isocrassumol B                                    | Xisha Islands, South China Sea | antibacterial, antiviral                             | cembrane diterpenoid | [33]      |
| 64  | sarcotrocheliol acetate                           | Jeddah, Saudi Arabia           | antibacterial, antifeedant,<br>cytotoxic             | cembrane diterpenoid | [16]      |
|     |                                                   | Hurghada, Egypt                | antibacterial                                        |                      | [31] [38] |
| 65  | sarcotrocheliol                                   | Jeddah, Saudi Arabia           | antibacterial, antifeedant,<br>cytotoxic             | cembrane diterpenoid | [16]      |
|     |                                                   | Hurghada, Egypt                | cytotoxic, anti-leishmanial                          |                      | [36] [39] |
| 66  | sarcotrocheldiol A                                | Jeddah, Saudi Arabia           | antibacterial                                        | cembrane diterpenoid | [37]      |
| 67  | sarcotrocheldiol B                                | Jeddah, Saudi Arabia           | antibacterial                                        | cembrane diterpenoid | [37]      |
| 68  | 9-hydroxy-10,11-dehydro-sarcotrocheliol           | Hurghada, Egypt                | antibacterial                                        | cembrane diterpenoid | [31]      |
| 69  | 9-hydroxy-7,8-dehydro-sarcotrocheliol             | Hurghada, Egypt                | antibacterial                                        | cembrane diterpenoid | [36] [38] |
| 70  | 8,9-expoy-sarcotrocheliol acetate                 | Hurghada, Egypt                | antibacterial                                        | cembrane diterpenoid | [38]      |
| 71  | sarcopyranoid A                                   | Hurghada, Egypt                | cytotoxic, antiviral                                 | cembrane diterpenoid | [39]      |
| 72  | sarcophytrol Q                                    | Hainan Island, South China Sea | cytotoxic, PTP1B inhibitory,<br>antiviral            | cembrane diterpenoid | [29]      |
| 73  | sarcophytrol R                                    | Hainan Island, South China Sea | cytotoxic, PTP1B inhibitory,<br>antiviral            | cembrane diterpenoid | [29]      |
| 74  | sarcophytrol S                                    | Hainan Island, South China Sea | cytotoxic, PTP1B inhibitory,<br>antiviral            | cembrane diterpenoid | [29]      |
| 75  | (+)-isosarcophine                                 | Kenting, Taiwan Island         | cytotoxic                                            | cembrane diterpenoid | [34]      |
| 76  | 7 $\beta$ ,8 $\alpha$ -dihydroxydeepoxysarcophine | Kenting, Taiwan Island         | cytotoxic                                            | cembrane diterpenoid | [35]      |
|     |                                                   | Kenting, Taiwan Island         | cytotoxic                                            |                      | [35]      |
| 77  | sarcophine                                        | Pulau Hantu, Singapore         | cytotoxic                                            | cembrane diterpenoid | [8]       |
|     |                                                   | Jeddah, Saudi Arabia           | antibacterial, antifungal,<br>cytotoxic, antifeedant |                      | [16]      |
| 78  | (-)-sartrochine                                   | South China Sea                | cytotoxic, antibacterial                             | cembrane diterpenoid | [40]      |
| 79  | sarcophytonolide J                                | Hainan Island, South China Sea | PTP1B inhibitory, cytotoxic                          | cembrane diterpenoid | [25]      |
| 80  | sarcophytonolide R                                | Hainan Island, South China Sea | cytotoxic, PTP1B inhibitory                          | cembrane diterpenoid | [25]      |
| 81  | ent-sarcophine                                    | Hainan Island, South China Sea | acetylcholinesterase inhibitory,<br>cytotoxic        | cembrane diterpenoid | [30]      |

| No. | Name                                                    | Locality                       | Bioassay                                      | Class                | Ref. |
|-----|---------------------------------------------------------|--------------------------------|-----------------------------------------------|----------------------|------|
| 82  | 2-hydroperoxysarcophine                                 | Hainan Island, South China Sea | acetylcholinesterase inhibitory,<br>cytotoxic | cembrane diterpenoid | [30] |
| 83  | trocheliol                                              | Pingtung, Taiwan Island        | -                                             | cembrane diterpenoid | [41] |
| 84  | trocheliolide A                                         | Lanyu Island, Taiwan           | cytotoxic                                     | cembrane diterpenoid | [43] |
| 85  | trocheliolide B                                         | Lanyu Island, Taiwan           | -                                             | cembrane diterpenoid | [44] |
| 86  | 7 $\beta$ -hydroxy-8 $\alpha$ -methoxydeepoxysarcophine | Gulf of Suez, Egypt            | -                                             | cembrane diterpenoid | [45] |
| 87  | trochelioid A                                           | Hurghada, Egypt                | -                                             | cembrane diterpenoid | [46] |
| 88  | trochelioid B                                           | Hurghada, Egypt                | -                                             | cembrane diterpenoid | [46] |
| 89  | 16-oxosarcophytonin E                                   | Hurghada, Egypt                | -                                             | cembrane diterpenoid | [46] |
| 90  | 8- <i>epi</i> -sarcophinone                             | Hurghada, Egypt                | -                                             | cembrane diterpenoid | [46] |
| 91  | 7 $\alpha$ ,8 $\alpha$ -sarcophine                      | Xisha Islands, South China Sea | antibacterial, antiviral                      | cembrane diterpenoid | [33] |
| 92  | sarcophytonin B                                         | Xisha Islands, South China Sea | antibacterial, antiviral                      | cembrane diterpenoid | [33] |
| 93  | sartrolide A                                            | Hainan Island, South China Sea | PTP1B inhibitory, cytotoxic,<br>antibacterial | cembrane diterpenoid | [26] |
| 94  | sartrolide B                                            | Hainan Island, South China Sea | PTP1B inhibitory, cytotoxic,<br>antibacterial | cembrane diterpenoid | [26] |
| 95  | sartrolide C                                            | Hainan Island, South China Sea | PTP1B inhibitory, cytotoxic,<br>antibacterial | cembrane diterpenoid | [26] |
| 96  | sartrolide D                                            | Hainan Island, South China Sea | PTP1B inhibitory, cytotoxic,<br>antibacterial | cembrane diterpenoid | [26] |
| 97  | sartrolide E                                            | Hainan Island, South China Sea | PTP1B inhibitory, cytotoxic,<br>antibacterial | cembrane diterpenoid | [26] |
| 98  | sartrolide F                                            | Hainan Island, South China Sea | PTP1B inhibitory, cytotoxic,<br>antibacterial | cembrane diterpenoid | [26] |
| 99  | sartrolide G                                            | Hainan Island, South China Sea | PTP1B inhibitory, cytotoxic,<br>antibacterial | cembrane diterpenoid | [26] |
| 100 | sartrolide H                                            | Hainan Island, South China Sea | PTP1B inhibitory, cytotoxic,<br>antibacterial | cembrane diterpenoid | [47] |
| 101 | sartrolide I                                            | Hainan Island, South China Sea | PTP1B inhibitory, cytotoxic,<br>antibacterial | cembrane diterpenoid | [47] |

| No. | Name                      | Locality                                  | Bioassay                                   | Class                             | Ref.      |
|-----|---------------------------|-------------------------------------------|--------------------------------------------|-----------------------------------|-----------|
| 102 | sartrolide J              | Hainan Island, South China Sea            | PTP1B inhibitory, cytotoxic, antibacterial | cembrane diterpenoid              | [47]      |
| 103 | ketoemblide               | Hainan Island, South China Sea            | PTP1B inhibitory, cytotoxic, antibacterial | cembrane diterpenoid              | [25]      |
| 104 | 4Z,12Z,14E-sarcophytolide | Hainan Island, South China Sea            | PTP1B inhibitory, cytotoxic, antibacterial | cembrane diterpenoid              | [25] [47] |
| 105 | sarcassin D               | Hainan Island, South China Sea            | PTP1B inhibitory, cytotoxic, antibacterial | cembrane diterpenoid              | [26] [47] |
| 106 | sarcassin E               | Hainan Island, South China Sea            | PTP1B inhibitory, cytotoxic, antibacterial | cembrane diterpenoid              | [25]      |
| 107 | emblide                   | Hainan Island, South China Sea            | PTP1B inhibitory, cytotoxic, antibacterial | cembrane diterpenoid              | [26] [47] |
| 108 | sarcophytolide            | Hainan Island, South China Sea            | antibacterial                              | cembrane diterpenoid              | [26]      |
| 109 | deacetylemblide           | Hainan Island, South China Sea            | PTP1B inhibitory, cytotoxic, antibacterial | cembrane diterpenoid              | [47]      |
| 110 | sarcophytrol T            | Hainan Island, South China Sea            | PTP1B inhibitory, cytotoxic, antibacterial | cembrane diterpenoid              | [29]      |
| 111 | sarcophytrol U            | Hainan Island, South China Sea            | PTP1B inhibitory, cytotoxic, antibacterial | cembrane diterpenoid              | [29]      |
| 112 | sarcophytin               | Kurside Island, India                     | -                                          | perhydrophenanthrane diterpenoids | [15]      |
| 113 | unnamed                   | Andaman and Nicobar Islands, Indian Ocean | -                                          | capnosane diterpenoids            | [48]      |
| 114 | sarsolilide B             | Hainan Island, South China Sea            | PTP1B inhibitory                           | capnosane diterpenoids            | [5]       |
| 115 | sarsolilide C             | Hainan Island, South China Sea            | PTP1B inhibitory                           | capnosane diterpenoids            | [5]       |
| 116 | sarsolilide A             | Hainan Island, South China Sea            | PTP1B inhibitory                           | capnosane diterpenoids            | [5]       |
| 117 | sarcophytrol A            | Hainan Island, South China Sea            | PTP1B inhibitory                           | capnosane diterpenoids            | [50]      |
| 118 | sarcophytrol B            | Hainan Island, South China Sea            | PTP1B inhibitory                           | capnosane diterpenoids            | [50]      |
| 119 | sarcophytrol C            | Hainan Island, South China Sea            | PTP1B inhibitory                           | capnosane diterpenoids            | [50]      |
| 120 | trocheliophol A           | Weizhou Island, South China Sea           | anti-inflammatory, antibacterial           | capnosane diterpenoids            | [6]       |
| 121 | trocheliophol B           | Weizhou Island, South China Sea           | anti-inflammatory, antibacterial           | capnosane diterpenoids            | [6]       |

| No. | Name                         | Locality                        | Bioassay                         | Class                     | Ref. |
|-----|------------------------------|---------------------------------|----------------------------------|---------------------------|------|
| 122 | trocheliophol C              | Weizhou Island, South China Sea | anti-inflammatory, antibacterial | capnosane diterpenoids    | [6]  |
| 123 | trocheliophol D              | Weizhou Island, South China Sea | anti-inflammatory, antibacterial | capnosane diterpenoids    | [6]  |
| 124 | trocheliophol E              | Weizhou Island, South China Sea | anti-inflammatory, antibacterial | capnosane diterpenoids    | [6]  |
| 125 | trocheliophol F              | Weizhou Island, South China Sea | anti-inflammatory, antibacterial | capnosane diterpenoids    | [6]  |
| 126 | trocheliophol G              | Weizhou Island, South China Sea | anti-inflammatory, antibacterial | capnosane diterpenoids    | [6]  |
| 127 | trocheliophol H              | Weizhou Island, South China Sea | anti-inflammatory, antibacterial | capnosane diterpenoids    | [6]  |
| 128 | trocheliophol I              | Weizhou Island, South China Sea | anti-inflammatory, antibacterial | capnosane diterpenoids    | [6]  |
| 129 | trocheliophol J              | Weizhou Island, South China Sea | anti-inflammatory, antibacterial | capnosane diterpenoids    | [6]  |
| 130 | trocheliophol K              | Weizhou Island, South China Sea | anti-inflammatory, antibacterial | capnosane diterpenoids    | [6]  |
| 131 | trocheliophol L              | Weizhou Island, South China Sea | anti-inflammatory, antibacterial | capnosane diterpenoids    | [6]  |
| 132 | trocheliophol M              | Weizhou Island, South China Sea | anti-inflammatory, antibacterial | capnosane diterpenoids    | [6]  |
| 133 | trocheliophol N              | Weizhou Island, South China Sea | anti-inflammatory, antibacterial | capnosane diterpenoids    | [6]  |
| 134 | trocheliophol O              | Weizhou Island, South China Sea | anti-inflammatory, antibacterial | capnosane diterpenoids    | [6]  |
| 135 | trocheliophol P              | Weizhou Island, South China Sea | anti-inflammatory, antibacterial | capnosane diterpenoids    | [6]  |
| 136 | trocheliophol Q              | Weizhou Island, South China Sea | anti-inflammatory, antibacterial | capnosane diterpenoids    | [6]  |
| 137 | trocheliophol R              | Weizhou Island, South China Sea | anti-inflammatory, antibacterial | capnosane diterpenoids    | [6]  |
| 138 | trocheliophol S              | Weizhou Island, South China Sea | anti-inflammatory, antibacterial | capnosane diterpenoids    | [6]  |
| 139 | sarcophytol L                | Weizhou Island, South China Sea | anti-inflammatory, antibacterial | capnosane diterpenoids    | [6]  |
| 140 | 4- <i>epi</i> -sarcophytol L | Weizhou Island, South China Sea | anti-inflammatory, antibacterial | capnosane diterpenoids    | [6]  |
| 141 | sarcophylide B               | Weizhou Island, South China Sea | anti-inflammatory, antibacterial | capnosane diterpenoids    | [6]  |
| 142 | sarcophylide C               | Weizhou Island, South China Sea | anti-inflammatory, antibacterial | capnosane diterpenoids    | [6]  |
| 143 | dihydrosarsolenone           | Hainan Island, South China Sea  | PTP1B inhibitory                 | sarsolenane diterpenoids  | [5]  |
| 144 | methyl dihydrosarsolenoneate | Hainan Island, South China Sea  | PTP1B inhibitory                 | sarsolenane diterpenoids  | [5]  |
| 145 | secodihydrosarsolenone       | Hainan Island, South China Sea  | PTP1B inhibitory                 | sarsolenane diterpenoids  | [51] |
| 146 | methyl sarcotroate A         | Hainan Island, South China Sea  | PTP1B inhibitory                 | sarcotroane diterpenoids  | [4]  |
| 147 | methyl sarcotroate B         | Hainan Island, South China Sea  | PTP1B inhibitory                 | sarcotroane diterpenoids  | [4]  |
| 148 | bissartrolide                | Hainan Island, South China Sea  | antibacterial                    | bissartrane biscebranoids | [47] |
| 149 | trocheliane                  | Jeddah, Saudi Arabia            | antibacterial                    | trocheliane biscebranoids | [37] |
| 150 | glaucumolide A               | Xisha Islands, South China Sea  | immunomodulatory                 | glaucumane biscebranoids  | [7]  |
| 151 | glaucumolide B               | Xisha Islands, South China Sea  | immunomodulatory                 | glaucumane biscebranoids  | [7]  |

| No. | Name            | Locality                       | Bioassay         | Class                   | Ref. |
|-----|-----------------|--------------------------------|------------------|-------------------------|------|
| 152 | bistrochelide A | Xisha Islands, South China Sea | immunomodulatory | glaucumane biscalanones | [7]  |
| 153 | bistrochelide B | Xisha Islands, South China Sea | immunomodulatory | glaucumane biscalanones | [7]  |
| 154 | bistrochelide C | Xisha Islands, South China Sea | immunomodulatory | glaucumane biscalanones | [7]  |
| 155 | bistrochelide D | Xisha Islands, South China Sea | immunomodulatory | glaucumane biscalanones | [7]  |
| 156 | bistrochelide E | Xisha Islands, South China Sea | immunomodulatory | glaucumane biscalanones | [7]  |

\* Note: In the table, '-' indicates no bioassay was performed.
